# Supplementary material
Source: Elsevier journal article supplement (https://www.sciencedirect.com/science/article/pii/S0213911116302618)
Supplement: mmc1 [file S0213911116302618:mmc1.docx]

**Cuestionario para la Vigilancia de Segunda Generación del VIH/Sida y otras ITS en Población de Mujeres Trabajadoras Sexuales**

**
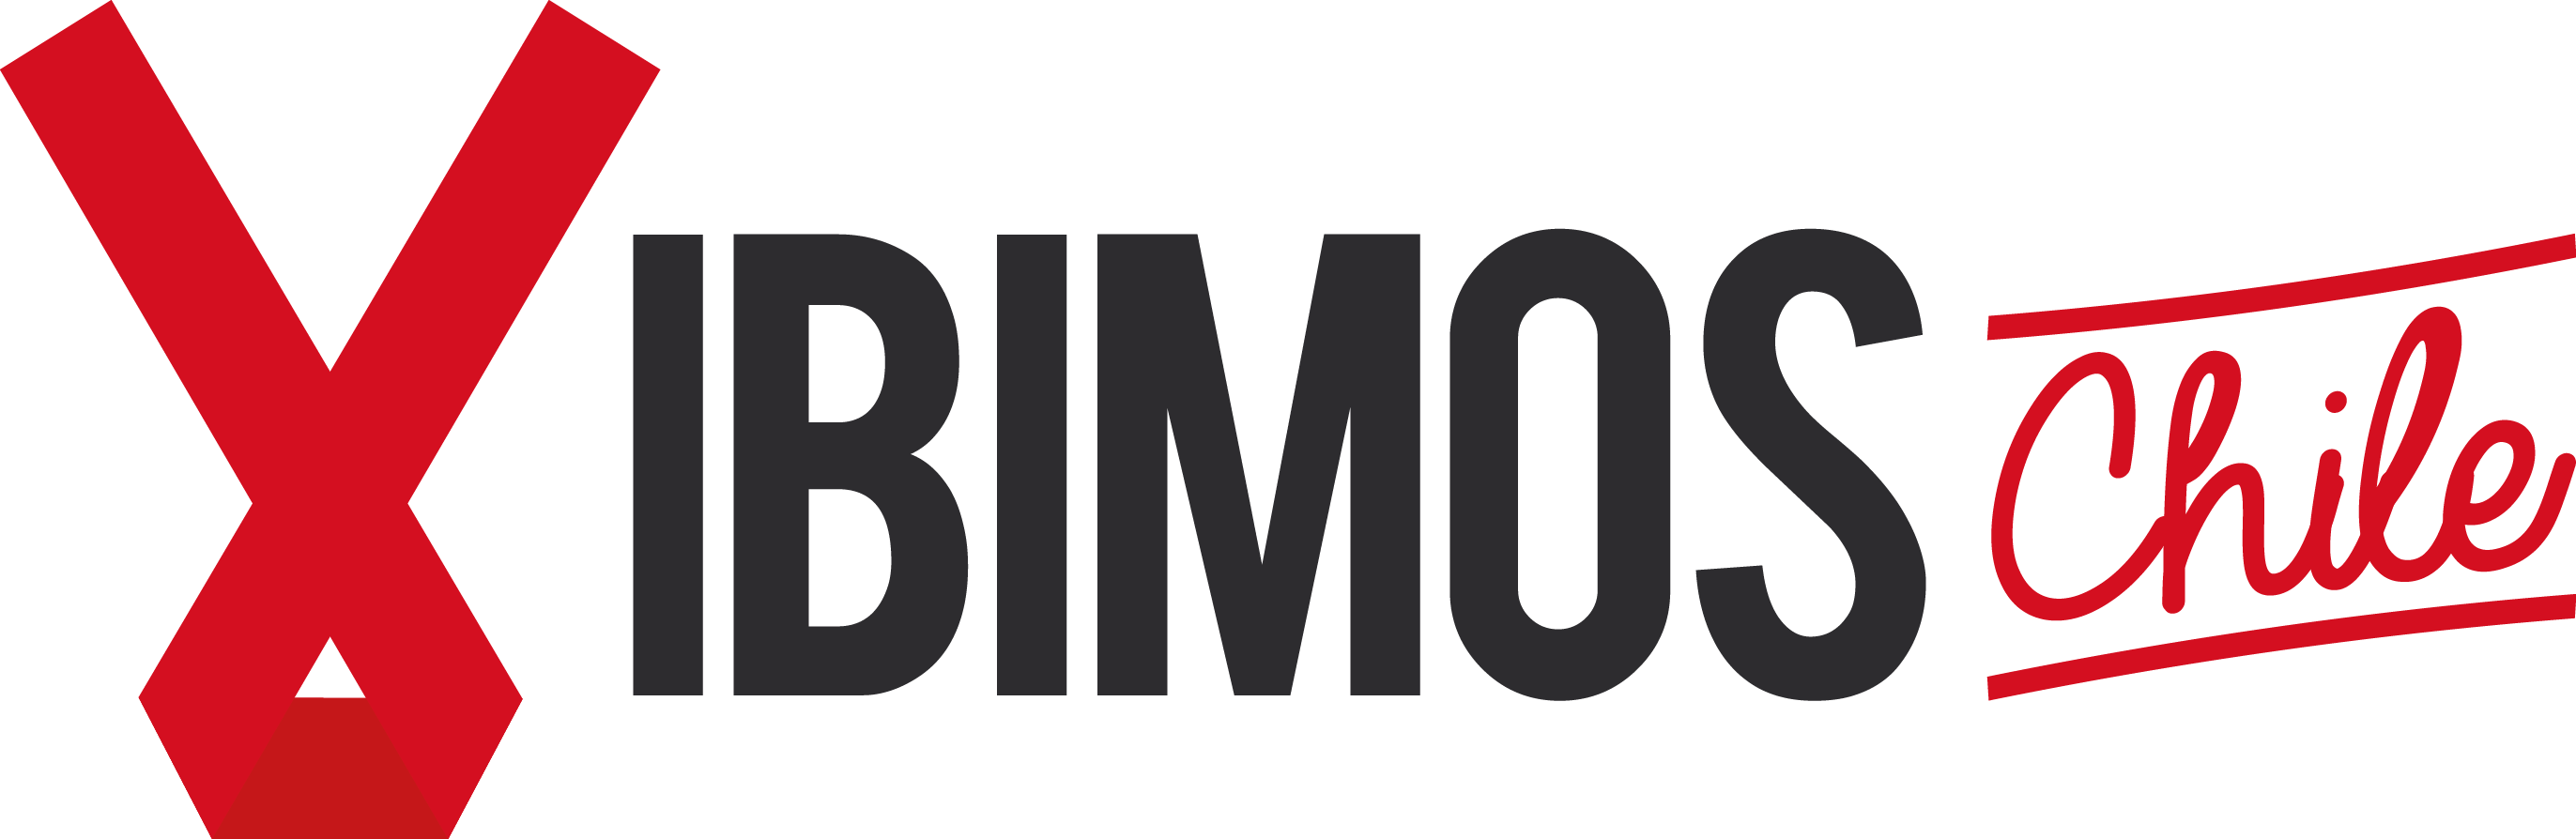
**

|  | **PROYECTO VIBIMOS-VIH Chile**  **Vigilancia Bioconductual y Monitorización Social del VIH Y OTRAS ITS en Chile**  **SECCION 1. IDENTIFICACION DEL CUESTIONARIO**   - 1. **NUMERO DE CUESTIONARIO**   2. **COMUNA DONDE SE REALIZA LA ENTREVISTA: __________________________**   3. **FECHA DE LA ENTREVISTA ____ / _____/ ______**   4. **NOMBRE ENCUESTADORA:****____________________________**   5. **LUGAR DONDE EJERCE EL TRABAJO SEXUAL**  1. CAFÉS 2. CLUB NOCTURNO/TOPLESS 3. CALLE / CARRETERA. 4. CASA DE TOLERANCIA 5. QUINTA DE RECREO    1. **EN LOS ÚLTIMOS 3 MESES, ¿HAS EJERCIDO EL TRABAJO SEXUAL EN OTRO LUGAR?**   Sí… 1  No… 2   - - 1. **¿Dónde?**  1. **CAFÉS.**   Especificar:_____________________________   1. **CLUB NOCTURNO/TOPLESS**   Especificar:_____________________________   1. **CALLE / CARRETERA.**   Especificar:_____________________________   1. **CASA DE TOLERANCIA.**   Especificar:_____________________________   1. **QUINTA DE RECREO**   Especificar:_____________________________   1. **OTRO:**   Especificar:_____________________________  **SECCION 2. FACTORES SOCIO-DEMOGRAFICOS** | | | | | |  |
| --- | --- | --- | --- | --- | --- | --- | --- |
|  | Fecha de nacimiento | __ __ / __ __/ __ __ __ __  (si no recuerda anotar 99) | |  | | |  |
|  | País de origen | Chile…  Otro país (especificar:__________________)…  No sabe / no contesta … | | 1 **🡪**  2  99 | | | **P6** |
|  | ¿Tienes papeles de residencia?  **(si responde en trámite, marcar No)** | Sí …  No …  No sabe / no contesta … | | 1  2**🡪**  99 | | | **P5** |
|  | 4.1. ¿Cuál?  ***🗊Esperar respuesta*** | Visa de turista …  Visa de estudiante …  Visa de trabajo …  Visa definitiva …  Otro: ___________________…  No sabe / no contesta … | | 1  2  3  4  5  99 | | |  |
|  | ¿En qué año llegaste a Chile por primera vez? | __ __ __ __ año  (si no recuerda anotar 55) | |  | | |  |
|  | ¿Puedes decirme tu situación de pareja no cliente/a?  🗊***Se puede marcar más de una respuesta*** | Con pareja estable y vive con ella …  Con pareja estable y no vive con ella …  Parejas ocasionales …  Sin pareja …  No sabe/ no contesta … | | 1  2  3  4  99 | | |  |
|  | En los últimos 6 meses, ¿Con quién has vivido?  🗊***Se puede marcar más de una respuesta*** | Sola …  Con mi pareja o esposo …  Con mis padres …  Con mis hijos …  Con niños que no son míos …  Con amiga/os, conocida/os …  Con compañeras de trabajo …  Otros (especif:________________) ...  No sabe/ no contesta ... | 1  2  3  4  5  6  7  8  99 | | |  | |
|  | ¿Cuál fue el último curso que aprobaste? | __ __ (curso)/________(nivel)  No sabe / no contesta…. | 99 | |  | | |

|  | En los últimos 6 meses, el lugar donde has vivido es:  🗊***Marcar solo el que considera su hogar*** | Propio …  Arrendado…  Donde trabajo (asilada)…  Vivo en la calle…  Allegado …  Otro (especif:____________)…  No sabe/ no contesta … | 1  2  3  4  5  6  99 | |  |  | |
| --- | --- | --- | --- | --- | --- | --- | --- |
|  | ¿Qué previsión de Salud posees? | FONASA A …  FONASA B …  FONASA C …  FONASA D…  ISAPRE …  CAPREDENA/FFAA …  No tiene previsión de salud …  No sabe/ no contesta … | | 1  2  3  4  5  6  7  99 | | |  |
|  | En los últimos 6 meses, ¿Has estado alguna vez detenida? | Sí …  No …  No sabe/ no contesta … | | 1  2 **🡪**  99 | | | **P12** |
|  | - 1. Esa detención ¿Estuvo relacionada con el trabajo sexual? | Sí …  No …  No sabe/ no contesta … | | 1  2  99 | | |  |
|  | En la actualidad, ¿tienes un trabajo diferente al de trabajadora sexual? | Sí (especif:_______________) …  No …  No sabe/ no contesta … | | 1  2  99 | | |  |
| **SECCION 3. USO DE DROGAS** | | | | | | | |
|  | ¿Cuántos vasos de alcohol consumes en una semana normal?  ***Si no lo sabe, preguntar el consumo diario y multiplicar por los días que bebe a la semana*** | Combinados, fuerte: ______  Cervezas/Chelas: ______  Vinos/Espumantes: ______  No tomo nada de alcohol …  No sabe / no contesta … | | 88  99 | | |  |
|  | ¿Has probado algún tipo de droga a lo largo de tu vida? | | |  | | |  |
|  |  | Sí …  No …  No sabe/ no contesta … | | 1  2 **🡪**  99 | | | **P19** |
|  | ¿Cuántos años (edad) tenías cuando probaste cualquier tipo de drogas por primera vez? | | |  | | |  |
|  |  | __ __ años  No sabe / no contesta…. | | 99 | | |  |

|  | ¿Has consumido en los últimos 6 meses....? |  | | | |  |  |
| --- | --- | --- | --- | --- | --- | --- | --- |
|  | |  | Sí | No | NS/NC | | --- | --- | --- | --- | | - 1. Cannabis ( porros, marihuana o yerba) | 1 | 2 | 99 | | - 1. pasta base ( angustia o pasturri) | 1 | 2 | 99 | | - 1. otras drogas (especificar): __________________________________________________________________________ | 1 | 2 | 99 | | | | | |  |  |
|  | ¿Alguna vez te has inyectado droga? | | | Sí …  No …  No sabe/ no contesta … | | 1  2  99 |  |
|  | ¿Consumes drogas para trabajar? | | | | | | |
|  | Sí …  No …  No sabe/ no contesta … | | | | 1  2  99 | |  |
| **SECCION 4. TRABAJO SEXUAL** | | | | | | | |
|  | ¿A qué edad tuviste tu primera experiencia sexual con penetración (en su vida general) | | | | |  |  |
|  | **(Vaginal o Anal)** | | | __ __ años  No sabe / no contesta … | | 99 |  |
|  | ¿A qué edad empezaste como trabajadora sexual? | | | __ __ años  No sabe / no contesta … | | 99 |  |
|  | **SI LA ENTREVISTADA ES CHILENA PASAR A LA PREGUNTA 23** | | | | | |  |
|  | ¿Empezaste a ejercer como trabajadora sexual en Chile? | | | | |  |  |
|  |  | | | Sí …  No …  No sabe/ no contesta … | | 1  2  99 |  |
|  | De lo que ganas, ¿A quién apoyas económicamente de forma regular? | | | | |  |  |
|  | Tú te lo quedas…  🗊***Se puede marcar más de una respuesta*** Pasas dinero a tu pareja…  Pasas dinero a tu Cafiche/ protector/a …  Pasas dinero a tu familia en el extranjero …  Pagas una deuda …  Otros, (epecifi.___________________)…  No sabe/ no contesta … | | | | | 1  2  3  4  5  6  99 |  |
|  | Por lo general, ¿Cuántos días en la semana ejerces el trabajo sexual? | | | | |  |  |
|  |  | | Diariamente …  Entre 5-6 días/semana …  Entre 3-4 días/semana …  Entre 1-2 días/semana …  No sabe/ no contesta … | | | 1  2  3  4  99 |  |

|  | ¿Cuánto dinero ganas aproximadamente en una semana normal?  Menos de 50.000 pesos…  50.000 – 100.000 pesos …  100.000 – 200.000 pesos …  200.000 – 400.000 pesos …  400.000 – 600.000 pesos …  600.000 o más…  No sabe / no contesta … | | | | | | 1  2  3  4  5  6  99 | |  |
| --- | --- | --- | --- | --- | --- | --- | --- | --- | --- |
|  | Aproximadamente, ¿Con cuántos/as clientes/as diferentes tienes relaciones sexuales en una semana? | | | | | |  | |  |
|  | ***Cliente/a: persona con la que tienen relaciones sexuales a cambio de dinero*** | | | | __ __ __ clientes/as  No sabe / no contesta…. | | 99 | |  |
|  | ¿Cómo detectas o compruebas el estado de salud de tus clientes/as? | | | | | |  | |  |
|  | 🗊***Se puede marcar más de una respuesta*** | | Por el aspecto general …  Por el olor …  Por su pene …  Por su cara …  Se lo pregunto …  Indirectamente, conversando …  No lo puedo saber …  Otros (__________________) …  No sabe/ no contesta … | | | | 1  2  3  4  5  6  7  8  99 | |  |
|  | La última vez que tuviste relaciones sexuales penetrativas con un cliente ¿Utilizaste preservativo? | | | | | |  | |  |
|  |  | | | | Sí…  No…  No Sabe/No contesta… | | 1  2  99 | |  |
|  | ¿Cuántos/as clientes/as FIJOS o Especiales tienes? | | | |  | |  | |  |
|  | **Cliente/a fijo/a: cliente /a que la conoce y siempre va con ella** | | | | __ __ __ clientes/as fijos  No sabe / no contesta…. | | 99 | | **Si es 00**  **Pasar a**  **P31** |
|  | **SECCION 5. HABITOS SEXUALES** | | | | | | | | |
|  | En los últimos 6 meses, con tus clientes/as **FIJOS o ESPECIALES**, ¿Con qué frecuencia has tenido… | | | | | | | |  |
|  | **A-** FRECUENCIA **B-** FRECUENCIA USO CONDON | | | | | | | | |
| - 1. Sexo vaginal: 1 2 3 4 5 99 🡪 | | | | | | 1 2 3 4 5 88 99 | | | |
| - 1. Sexo anal: 1 2 3 4 5 99 🡪 | | | | | | 1 2 3 4 5 88 99 | | | |
| - 1. Sexo oral: 1 2 3 4 5 99 🡪 | | | | | | 1 2 3 4 5 88 99 | | | |
| 1-siempre 2-a menudo/casi siempre 3-la mitad de las veces 4-ocasionalmente 5-nunca  88-no procede 99-no sabe/no contesta | | | | | | | | | |
| **SI LA ENTREVISTADA SIEMPRE USA CONDON CON CLIENTES/AS FIJOS PASAR A LA PREGUNTA 31** | | | | | | | | | |
|  | En estos últimos 6 meses, la última vez que NO usaste el condón con un /a cliente/a **FIJO**, ¿Cuál fue el motivo principal?  R:____________________________________________________________________________ | | | | | | | | |
|  | En los últimos 6 meses, ¿has tenido CLIENTES NO FIJOS?  Si…  No… | | | | | | 1  2**🡪** | | **P35** |
|  | En los últimos 6 meses, con tus clientes/as **NO FIJOS/AS**, ¿Con qué frecuencia has tenido … | | | | | | | |  |
|  | 1. FRECUENCIA | | | | **B-** FRECUENCIA USO CONDON | | | | |
| - 1. Sexo vaginal: 1 2 3 4 5 99 🡪 | | | | 1 2 3 4 5 88 99 | | | | | |
| - 1. Sexo anal: 1 2 3 4 5 99 🡪 | | | | 1 2 3 4 5 88 99 | | | | | |
| - 1. Sexo oral: 1 2 3 4 5 99 🡪 | | | | 1 2 3 4 5 88 99 | | | | | |
| 1-siempre 2-a menudo/casi siempre 3-la mitad de las veces 4-ocasionalmente 5-nunca  88-no procede 99-no sabe/no contesta | | | | | | | | | |
| **SI LA ENTREVISTADA SIEMPRE USA CONDON CON CLIENTES/AS NO FIJOS/AS PASAR A LA PREGUNTA 34** | | | | | | | | | |
|  | En estos últimos 6 meses, la última vez que NO usaste el condón con un/a cliente/a **NO FIJO**, ¿Por qué motivo fue? (Principal) | | | | | | | |  |
|  | R:_____________________________________________________________ | | | | | | | | |
|  | Cuando tienes relaciones sexuales con tus clientes (**fijos y no fijos**), ¿quién toma la decisión de usar o no usar el condón? | | | | | | | | |
|  |  | Tú …  El cliente …  Ambos …  No uso nunca condón con los clientes …  No sabe / no contesta … | | | | | | 1  2  3  4  99 |  |
|  | En los últimos 6 meses, ¿Has tenido alguna **pareja estable masculina o femenina**? | | | | | | | |  |
|  |  | | | Sí …  No …  No sabe/ no contesta … | | | 1  2**🡪**  99 | | **P39** |
|  | En estos últimos 6 meses, ¿Con cuántas de estas **parejas estables masculinas o femeninas** has tenido sexo? | | | | | | | |  |
|  |  | | | __ __ parejas  No sabe / no contesta … | | | 99 | | **Si es 00 pasar a 39** |

|  | En los últimos 6 meses, con tu **PAREJA ESTABLE**, ¿Con qué frecuencia has tenido…? | | | |  |
| --- | --- | --- | --- | --- | --- |
|  | **A-** FRECUENCIA | **B-** FRECUENCIA USO CONDON | | | |
| - 1. Sexo vaginal: 1 2 3 4 5 99 🡪 | | | 1 2 3 4 5 88 99 | | |
| - 1. Sexo anal: 1 2 3 4 5 99 🡪 | | | 1 2 3 4 5 88 99 | | |
| - 1. Sexo oral: 1 2 3 4 5 99 🡪 | | | 1 2 3 4 5 88 99 | | |
| 1-siempre 2-a menudo/casi siempre 3-la mitad de las veces 4-ocasionalmente 5-nunca 88-no procede 99-no sabe/no contesta | | | | | |
| **SI LA ENTREVISTADA SIEMPRE USA CONDON CON LA PAREJA ESTABLE PASAR A LA PREGUNTA 39** | | | | | |
|  | En estos últimos 6 meses, la última vez que NO usaste el condón con tu **pareja estable**, ¿por qué motivo fue? (Principal) | | | |  |
|  | R:______________________________________________________ | | | |  |
|  | La última vez que tuviste relaciones sexuales con penetración con **una pareja estable,** ¿Usaste el condón? | | | |  |
|  |  | Sí …  No …  Nunca ha tenido pareja estable…  Sólo parejas estables femeninas…  No sabe/ no contesta … | | 1  2  3  4  99 |  |
|  | Cuando tienes relaciones sexuales con **tu pareja estable**, ¿Quién toma la decisión de usar o no usar el condón? | | | | |
|  |  | Tú …  Tu pareja …  Ambos …  No usan condón …  Nunca ha tenido pareja estable…  Sólo parejas estables femeninas…  No sabe / no contesta … | | 1  2  3  4  5  6  99 |  |
|  | ¿Alguna de tus **parejas estables** ha usado droga inyectable? | | |  |  |
|  |  | Sí …  No …  No sabe/ no contesta … | | 1  2  99 |  |
|  | ¿Alguna vez ha tenido una **pareja estable** con VIH/Sida? | | |  |  |
|  |  | Sí …  No …  No sabe/ no contesta … | | 1  2  99 |  |
|  | En los últimos 12 meses, ¿has recibido condones/preservativos? | | |  |  |
|  |  | Sí …  No …  No sabe/ no contesta … | | 1  2  99 |  |
|  | **SI LA ENTREVISTADA NO HA USADO NUNCA CONDON NI CON SUS CLIENTES NI CON SU PAREJA ESTABLE PASAR A LA PREGUNTA 47** | | | |  |

|  | En los últimos 12 meses, ¿dónde has conseguido los condones que has utilizado con tus clientes o parejas estables? | | | | |  |
| --- | --- | --- | --- | --- | --- | --- |
|  | **⌦*no lea las respuestas***  ***🖐Anotar una sola respuesta, la más habitual*** | | Los compro en la farmacia…  En un consultorio…  UNACESS/ Centro de Salud Sexual…  Asociación o Agrupación…  En mi lugar de trabajo …  Los compro en la calle …  Otras (______________) …  No sabe / no contesta … | 1  2  3  4  5  6  7  99 | |  |
|  | En los último 6 meses ¿Alguna vez se te ha roto el preservativo/condón? | | |  | |  |
|  |  | | Sí …  No …  No sabe/ no contesta … | 1  2 🡪  99 | | **P 47** |
|  | Después de atender un cliente, ¿Qué haces si se te ha roto un preservativo/condón? | | |  | |  |
|  | 🗊***Se puede marcar más de una respuesta***  **⌦*no lea las respuestas*** | | No haces nada…  Vas al centro de salud o ITS …  Vas a médico particular…  Tomas antibióticos (por su cuenta)…  Usas cremas u óvulos (por su cuenta)…  Prueba de embarazo (por su cuenta) …  Píldora del día después (por su cuenta) …  Otras (_________________) …  No sabe /no contesta … | 1  2  3  4  5  6  7  8  99 | |  |
|  | ¿Has utilizado alguna vez un condón femenino? | | |  | |  |
|  |  | | Sí …  No …  No sabe/ no contesta … | 1  2  99 | |  |
|  | Alguna vez, ¿has sido obligada a mantener relaciones sexuales en contra de tu voluntad? | | |  | |  |
|  |  | | Sí …  No …  No sabe/ no contesta … | 1  2 🡪  99 | | **P49** |
|  | - 1. ¿Podrías decirnos si fue con….?   🗊***Se puede marcar más de una respuesta*** | | Tu pareja …  Un cliente/a …  Un desconocido …  Familiares …  Amigos …  Tu cafiche/ protector …  Policía (Carabineros, PDI) …  Otros( __________________) …  No sabe /no contesta … | 1  2  3  4  5  6  7  8  99 | |  |
|  | - 1. ¿Se utilizó condón en esa(s) relación(es) no voluntarias? | | Sí …  No …  No siempre …  No sabe/ no contesta … | 1  2  3  99 | |  |
|  | En los últimos 6 meses, ¿has practicado sexo en grupo (orgía, partusa) o el intercambio de parejas con clientes/as o parejas estables? | | | | |  |
|  |  | | Sí …  No …  No sabe/ no contesta … | 1  2  99 | |  |
| **SECCION 6. ESTADO DE SALUD** | | | | | | |
|  |  | | | | |  |
|  | Durante los últimos 6 meses, ¿Qué método (además del preservativo) has usado para no quedar embarazada durante las relaciones sexuales (clientes o pareja estable)? | | | | |  |
|  | **⌦*no lea las respuestas*** | | Ningún Método…  Ningún método, mi pareja estable es mujer…  Anticonceptivo Oral …  T de Cobre (DIU) …  Anticonceptivo Inyectable…  Parche Anticonceptivo …  Implante Anticonceptivo …  Menopausia/Histerectomizada/Ligada de Tubas …  No sabe/ no contesta … | 1  2  3  4  5  6  7  8  99 | |  |
|  | ¿Cada cuánto acudes al control de salud sexual? | | |  |  | |
|  |  | Nunca …  1 vez al año …  2 a 3 veces al año …  Más de 3 veces al año …  Otro (esp:_____________________) …  No sabe/ no contesta … | | 1  2  3  4  5  99 |  | |
|  | - 1. ¿Dónde acudes a estos controles generalmente?   Consultorio/Cesfam/APS …  UNACESS …  Hospital o CDT…  Sector Particular …  No sabe/ no contesta … | | | 1  2  3  4  99 |  | |
|  | ¿Cuántos hijos tienes? | | |  |  | |
|  |  | __ __ hijos  No sabe / no contesta…. | | 99 |  | |
|  | ¿Cuántos hijos u otros niños que no son tuyos dependen de ti económicamente? | | |  |  | |
|  |  | __ __ hijos/niños  No sabe / no contesta…. | | 99 |  | |

|  | ¿Has tenido alguna vez...? | | | | |  |  | | | | |
| --- | --- | --- | --- | --- | --- | --- | --- | --- | --- | --- | --- |
|  | 🗊***Se puede marcar más de una respuesta*** | Hepatitis B …  Hepatitis C …  Hepatitis, pero no sé el tipo …  Tuberculosis …  No he tenido estas enfermedades …  No sabe / no contesta … | | | | 1  2  3  4  5  99 |  | | | | |
|  | ¿Has tenido alguna vez alguna infección de transmisión sexual (ITS)? | | | | |  |  | | | | |
|  |  | Sí …  No …  No sabe/ no contesta … | | | | 1  2 🡪  99 | **P56** | | | | |
|  | - 1. El último año ¿Tuviste alguna ITS?   Sí …  No …  No sabe/ no contesta … | | | | | 1  2 🡪  99 | **P56** | | | | |
|  | - 1. Si es que sí, ¿Cuál fue/es? | | | | |  | | | | | | |
|  | Herpes (genital/anal) …  Gonorrea …  Vaginitis bacteriana/ Tricomoniasis …  Candidiasis/ hongos vaginales…  🗊***Se puede marcar más de una respuesta***  Sífilis …  Verrugas genitales/Condilomas …  Infección por clamidia …  Otras ITS (especif:__________________) …  No sabe/ no contesta … | | | | | 1  2  3  4  5  6  7  8  99 | | | | | | |
|  | ¿Hace cuánto tiempo te realizaste el último Papanicolaou (PAP)? | | | | |  | |  | | |
|  | Nunca …  Menos de 1 año …  Entre 1 y 2 años …  Entre 2 y 3 años …  Más de 3 años …  No sabe/ no contesta … | | | | | 1🡪  2  3  4  5  99 | | **P58** | | |
|  | ¿Cuál fue el resultado del último PAP? | | | | |  | |  | | |
|  | Normal …  Alterado …  No sabe/ no contesta … | | | | | 1  2  99 | |  | | |
|  | ¿De cuál de las siguientes formas se transmite el VIH? | | | | |  | |  | | |
|  | Por compartir jeringas ya usadas …  Por relaciones sexuales vaginales sin preservativos …  Por relaciones sexuales anales sin preservativo …  Por relaciones sexuales orales sin preservativo …  Por haber nacido de madre con VIH/Sida … | | Sí  1  1  1  1  1 | No  2  2  2  2  2 | Ns/Nc  99  99  99  99  99 | | | |  | | |
|  | ¿Sabes dónde acudir para realizarse el examen del VIH? | | | | |  | |  | | |
|  | Si …  No …  No sabe/ no contesta … | | | | | 1  2  99 | |  | | |
|  | ¿Te has hecho alguna vez la prueba para el VIH? | | | | |  | |  | | |
|  |  | Si, y fui a recoger los resultados …  Si, pero no fui a recoger los resultados …  No …  No sabe / no contesta … | | | | 1  2  3🡪  99 | | **Fin Encuesta** | | |
|  | ¿Te has hecho la prueba para el VIH en los últimos 12 meses? | | | | |  | |  | | |
|  |  | Sí …  No …  No sabe / no contesta … | | | | 1  2🡪  99 | | **P63** | | |
|  | ¿Te importaría decirnos el resultado de la última prueba para el VIH? | | | | |  | |  | | |
|  |  | Reactivo/Positivo …  No reactivo/Negativo …  No lo quiero decir …  No sabe / no contesta … | | | | 1🡪  2 🡪  3🡪  99🡪 | | **64**  **Fin**  **Fin**  **64** | | |
|  | ¿Cuál fue el motivo por el que no te has hecho la prueba del VIH/Sida en los últimos 12 meses?***🖐Anotar una sola respuesta, el motivo principal***  ***_____________________________________________________*** | | | | |  | | | | |
|  | Durante los últimos 6 meses, ¿has tomado terapia antiretroviral para la infección por el VIH/Sida? | | | | |  | |  | |
|  | Sí …  No , porque no la necesito …  No, porque no quiero tomarla …  No sabe / no contesta … | | | | | 1  2  3  99 | |  | |

##### MUCHAS GRACIAS POR TU COLABORACIÓN

###### NOTAS Y COMENTARIOS DE LA ENTREVISTADORA

__________________________________________________________________________________________________________________________________________________________________________________________________________________________________________________________________________________________________________________________________________________________________________________
